# Supplementary material
Source: PubMed Central journal article supplement (PMC4420902)
Supplement: JB.00086-15_zjb999093621so1.pdf [file JB.00086-15_zjb999093621so1.pdf]

**Supplemental Table . List of constructs and primers**

| Primer                   | Description                                                                | Sequence                               |
|--------------------------|----------------------------------------------------------------------------|----------------------------------------|
| Full length TP0326-F     | amplification of <i>TP0326</i>                                             | AAAGCTAGCATGCAGGCAAACGACAATTGGTAC      |
| Full length TP0326-R     | amplification of <i>TP0326</i>                                             | GGGAAGCTTCAAATTATTTACCGTGAACGACAACACAA |
| L3 $\beta$ 6-F           | amplification of <i>L3<math>\beta</math>6</i>                              | AAAGGATCCATGGGCAACGGGCTG               |
| L3 $\beta$ 6-R           | amplification of <i>L3<math>\beta</math>6</i>                              | CCCCTCGAG GCGGAATACTTGAG               |
| L4-F                     | amplification of <i>L4</i>                                                 | AAAGGATCCATG ATTAGGGTGAAC              |
| L4-R                     | amplification of <i>L4</i>                                                 | CCCCTCGAGCGTCCAAAACGA                  |
| L6-F                     | amplification of <i>L6</i>                                                 | AAAGGATCCATGGTTCAAACGTATTAT            |
| L6 <sup>Ab</sup> -F      | amplification of L6 <sup>Ab</sup>                                          | AAAGGATCCATGGGACGGAGGAAAAGCGAA         |
| L6 & L6 <sup>Ab</sup> -R | amplification of L6 & L6 <sup>Ab</sup>                                     | CCCCTCGAGGTCTCCGGTGTTTTT               |
| L7-F                     | amplification of <i>L7</i>                                                 | AAAGGATCCATGGATGCGGCAATGGTGTAC         |
| L7-R                     | amplification of <i>L7</i>                                                 | CCCCTCGAG CAGTCCTTCAGAGCT              |
| 326 <sup>Pel</sup> -F    | amplification of 326 <sup>Pel</sup>                                        | AAAGGATCCCATGCAGGCAAACGACAATTGG        |
| 326 <sup>Pel</sup> -R    | amplification of 326 <sup>Pel</sup>                                        | GGGAAGCTTCAAATTATTTACCGTGAACGACAACACAA |
| POTRA-F                  | amplification of <i>POTRA</i>                                              | CCCCTAGCATGCAGGCAAACGACAATTGGTAC       |
| POTRA-R                  | amplification of <i>POTRA</i>                                              | CCCAAGCTTCTGCTCCTCCACATTGAG            |
| $\beta$ -barrel-F        | amplification of <i><math>\beta</math>-barrel</i>                          | AAAGCTAGCATGAACGTTGAAGAACAATCG         |
| $\beta$ -barrel-R        | amplification of <i><math>\beta</math>-barrel</i>                          | TTTAAGCTTCAGATTGTTAACGGTAAA            |
| $\beta$ -barrel-F1       | amplification of <i><math>\beta</math>-barrel</i> from Cali-77 and Cali-84 | AATGTGGAGGAGCAGTCGACG                  |
| $\beta$ -barrel-R1       | amplification of <i><math>\beta</math>-barrel</i> from Cali-77 and Cali-84 | CTACAAATTATTTACCGTGAAC                 |
| L4 <sup>Gln593</sup> (+) | Mutagenesis of <i>L4</i>                                                   | CAGCCCTTCGACCAGACCGTAAAAGAG            |
| L4 <sup>Gln593</sup> (-) | Mutagenesis of <i>L4</i>                                                   | TCTTTTACGGTCTGGTCGAAGGGCTG             |
| Skp of <i>E. coli</i> -F | amplification of <i>skp</i>                                                | GATAGCTAGCGCTGACAAAATTGCAATCGTC        |
| Skp of <i>E. coli</i> -R | amplification of <i>skp</i>                                                | GATAAAGCTTTTTAACCTGTTTCAGTACGTCG       |

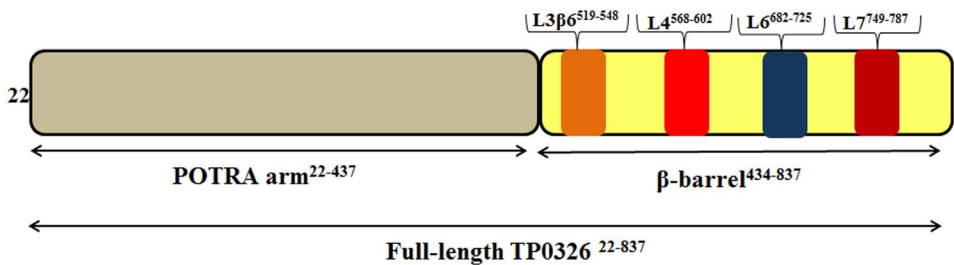

**Supplemental Figure 1.** Schematic representation of TP0326 recombinant constructs utilized in this study.

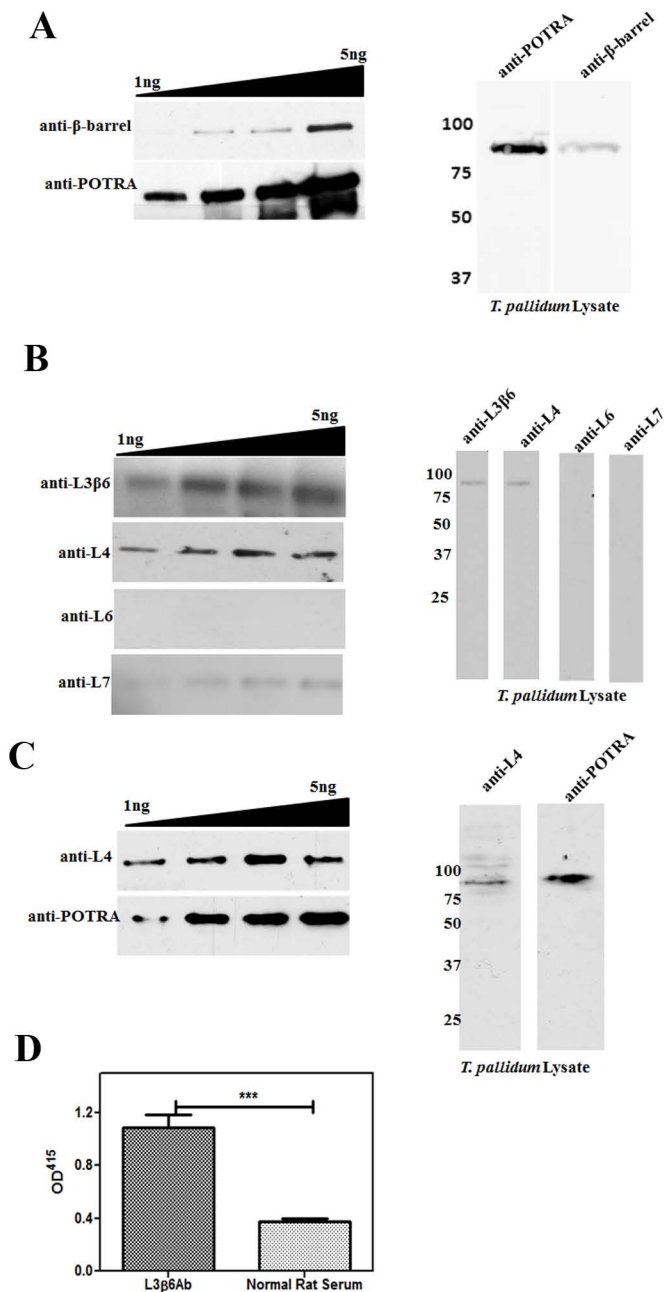

**Supplemental Figure 2. Sensitivity and specificity of antisera.** (A) Immunoblot reactivity of rat anti-β-barrel and -POTRA antisera against graded amounts of recombinant full-length TP0326 and *T. pallidum* whole cell lysates ( $1 \times 10^8$  *Tp* per lane). (B) Immunoblot reactivity of rat anti-L3β6, L4, L6, and -L7 antisera against graded amounts of recombinant β-barrel and *T. pallidum* whole cell lysates ( $1 \times 10^8$  *Tp* per lane). (C) Immunoblot reactivity of rabbit anti-L4 and anti-POTRA against recombinant full-length TP0326 and *T. pallidum* whole cell lysates ( $1 \times 10^8$  *Tp* per lane). (D) Reactivity of rat anti- L3β6 and normal rat antisera against L3 peptide.

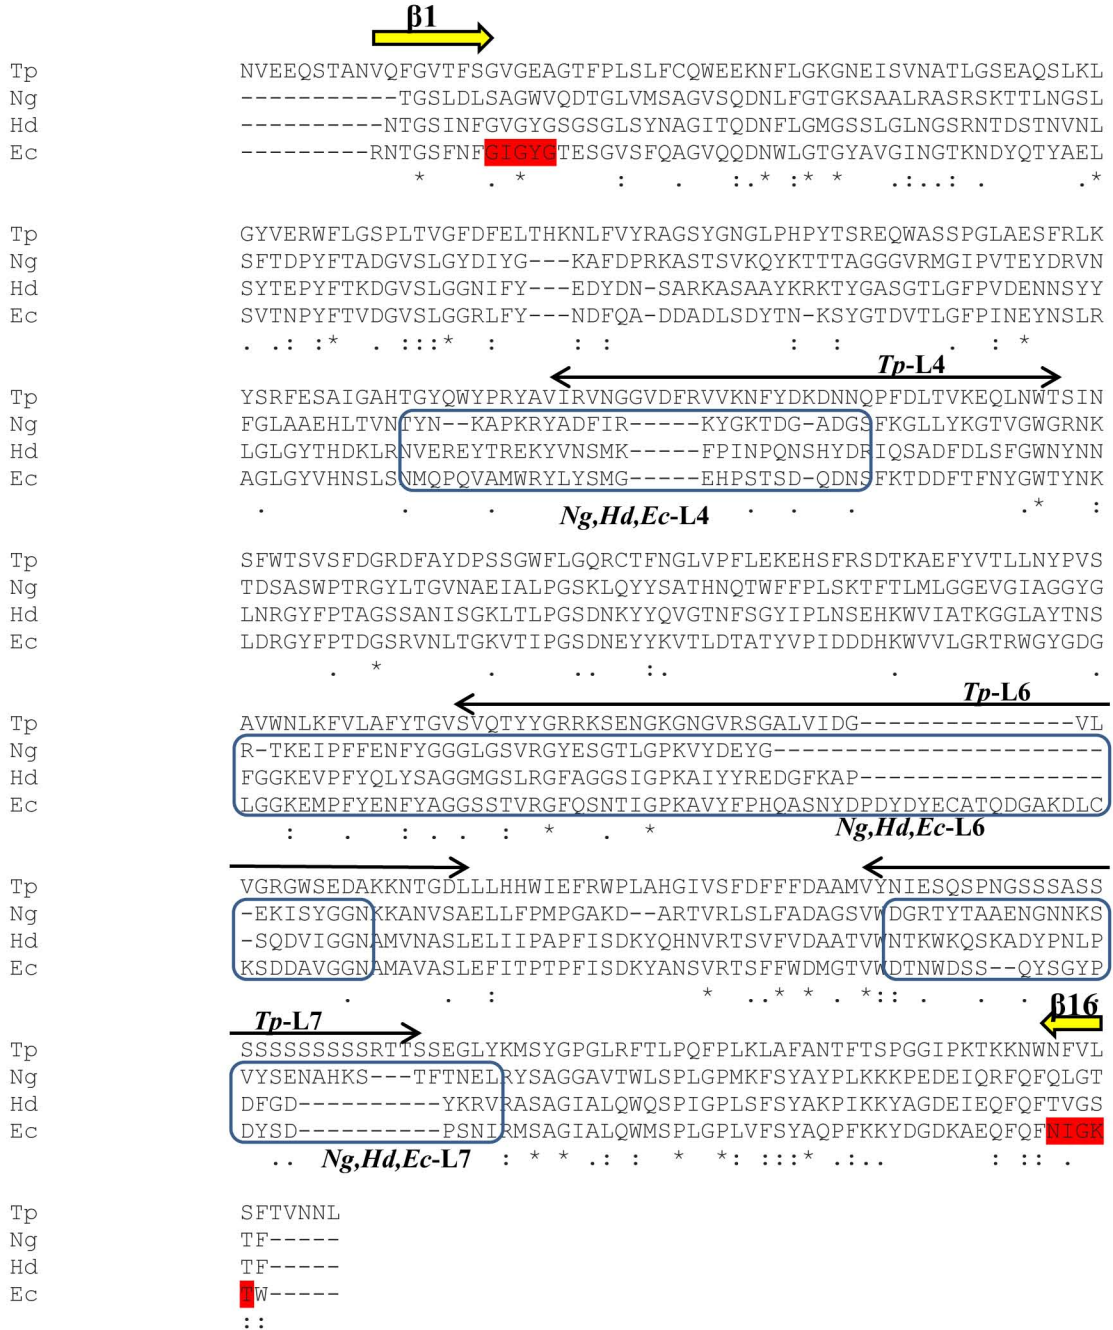

**Supplemental Figure 3.** Sequence alignment of the  $\beta$ -barrel domains of *T. pallidum* (Tp), *N. gonorrhoeae* (Ng), *H. ducreyi* (Hd) and *E. coli* (Ec) BamA. The multiple sequence alignment was performed using the ClustalW server (<http://www.ebi.ac.uk/Tools/msa/clustalw2/>). Identical positions are indicated by asterisks, while strongly homologous residues are denoted by colons. Weakly homologous residues are marked by single dots. The  $\beta$ -1 and  $\beta$ -16 strands of TP0326  $\beta$ -barrel are indicated by yellow arrows. The residues essential for lateral opening of *E. coli* BamA are highlighted in red. The L4, L6 and L7 loops of TP0326 are depicted by black lines, whereas the corresponding loops in *Ng*, *Hd*, and *EC* BamAs are within the blue box.

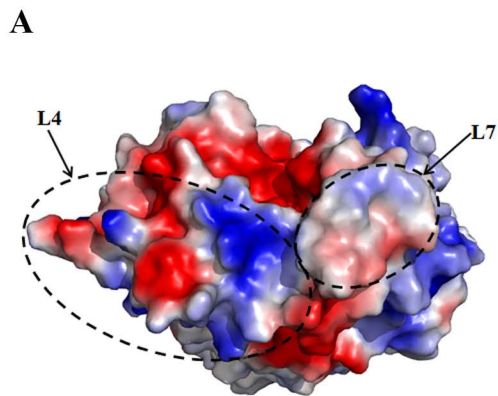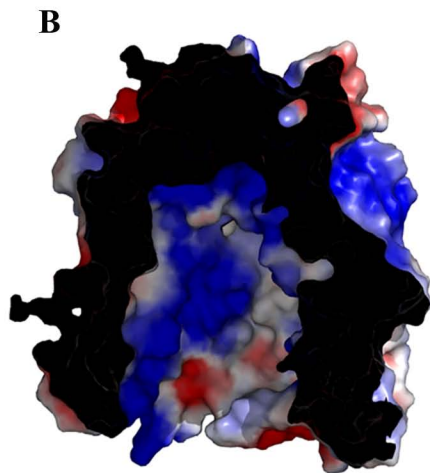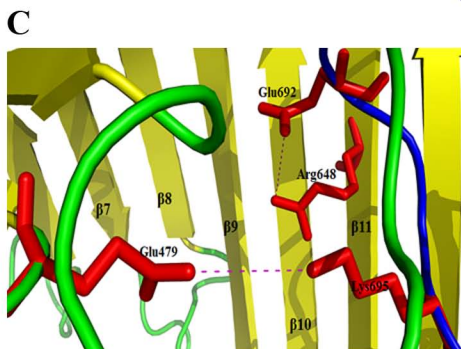

**Supplemental Figure 4.** Electrostatic potential of the TP0326  $\beta$ -barrel viewed from the extracellular face (A) and inside the  $\beta$ -barrel (B). (C) Salt bridges (dashed lines) predicted by ModWeb to stabilize L6 to L3 and  $\beta 11$ .

# Supplemental Figure 5A

Nichols 1 MLKKASAFLLIASCVCMSLAWAQANDNWEYEGKPI SAISFEGLEYIARGOLDTIFSOYKGQK  
SS14 1 MLKKASAFLLIASCVCMSLAWAQANDNWEYEGKPI SAISFEGLEYIARGOLDTIFSOYKGQK  
Dal-1 1 MLKKASAFLLIASCVCMSLAWAQANDNWEYEGKPI SAISFEGLEYIARGOLDTIFSOYKGQK  
Chicago 1 MLKKASAFLLIASCVCMSLAWAQANDNWEYEGKPI SAISFEGLEYIARGOLDTIFSOYKGQK  
Mexico 1 MLKKASAFLLIASCVCMSLAWAQANDNWEYEGKPI SAISFEGLEYIARGOLDTIFSOYKGQK

Nichols 61 WTYEYLYLEILQKVYDLEYFSEVSPKAVPTDPEYQYVMLQFTVKERPSVKGIKMVGNSQIR  
SS14 61 WTYEYLYLEILQKVYDLEYFSEVSPKAVPTDPEYQYVMLQFTVKERPSVKGIKMVGNSQIR  
Dal-1 61 WTYEYLYLEILQKVYDLEYFSEVSPKAVPTDPEYQYVMLQFTVKERPSVKGIKMVGNSQIR  
Chicago 61 WTYEYLYLEILQKVYDLEYFSEVSPKAVPTDPEYQYVMLQFTVKERPSVKGIKMVGNSQIR  
Mexico 61 WTYEYLYLEILQKVYDLEYFSEVSPKAVPTDPEYQYVMLQFTVKERPSVKGIKMVGNSQIR

Nichols 121 SGDLLSKILLKKGDIYNEVKMKVDQESLRRHYLDQGYAAVKISCEAKTEAGGVVVFQFTIQ  
SS14 121 SGDLLSKILLKKGDIYNEVKMKVDQESLRRHYLDQGYAAVKISCEAKTEAGGVVVFQFTIQ  
Dal-1 121 SGDLLSKILLKKGDIYNEVKMKVDQESLRRHYLDQGYAAVKISCEAKTEAGGVVVFQFTIQ  
Chicago 121 SGDLLSKILLKKGDIYNEVKMKVDQESLRRHYLDQGYAAVKISCEAKTEAGGVVVFQFTIQ  
Mexico 121 SGDLLSKILLKKGDIYNEVKMKVDQESLRRHYLDQGYAAVKISCEAKTEAGGVVVFQFTIQ

Nichols 181 EGKQTVVSRIQFKGNKAFTE SVLKKV LSTQEARFLTSGVFKENALEADKAAVHSSYYAERG  
SS14 181 EGKQTVVSRIQFKGNKAFTE SVLKKV LSTQEARFLTSGVFKENALEADKAAVHSSYYAERG  
Dal-1 181 EGKQTVVSRIQFKGNKAFTE SVLKKV LSTQEARFLTSGVFKENALEADKAAVHSSYYAERG  
Chicago 181 EGKQTVVSRIQFKGNKAFTE SVLKKV LSTQEARFLTSGVFKENALEADKAAVHSSYYAERG  
Mexico 181 EGKQTVVSRIQFKGNKAFTE SVLKKV LSTQEARFLTSGVFKENALEADKAAVHSSYYAERG

Nichols 241 YIDARVEGVAKTVDKKTDASRNLVTLTYTVVEGEQYRYGGVTIVGNQIFSTEELQAKIRL  
SS14 241 YIDARVEGVAKTVDKKTDASRNLVTLTYTVVEGEQYRYGGVTIVGNQIFSTEELQAKIRL  
Dal-1 241 YIDARVEGVAKTVDKKTDASRNLVTLTYTVVEGEQYRYGGVTIVGNQIFSTEELQAKIRL  
Chicago 241 YIDARVEGVAKTVDKKTDASRNLVTLTYTVVEGEQYRYGGVTIVGNQIFSTEELQAKIRL  
Mexico 241 YIDARVEGVAKTVDKKTDASRNLVTLTYTVVEGEQYRYGGVTIVGNQIFSTEELQAKIRL

Nichols 301 KRGAIMNMVAFEQGFQALADAYFENGYTSNYLNKEHRDTAEKTL SFKITVVERERSHVE  
SS14 301 KRGAIMNMVAFEQGFQALADAYFENGYTSNYLNKEHRDTAEKTL SFKITVVERERSHVE  
Dal-1 301 KRGAIMNMVAFEQGFQALADAYFENGYTSNYLNKEHRDTAEKTL SFKITVVERERSHVE  
Chicago 301 KRGAIMNMVAFEQGFQALADAYFENGYTSNYLNKEHRDTAEKTL SFKITVVERERSHVE  
Mexico 301 KRGAIMNMVAFEQGFQALADAYFENGYTSNYLNKEHRDTAEKTL SFKITVVERERSHVE

Nichols 361 HIIKGTKNTKDEVILREMLLKP GDVFSKSKFTDSLRLNLFNLYRFSSLVDPVRPGSEQDL  
SS14 361 HIIKGTKNTKDEVILREMLLKP GDVFSKSKFTDSLRLNLFNLYRFSSLVDPVRPGSEQDL  
Dal-1 361 HIIKGTKNTKDEVILREMLLKP GDVFSKSKFTDSLRLNLFNLYRFSSLVDPVRPGSEQDL  
Chicago 361 HIIKGTKNTKDEVILREMLLKP GDVFSKSKFTDSLRLNLFNLYRFSSLVDPVRPGSEQDL  
Mexico 361 HIIKGTKNTKDEVILREMLLKP GDVFSKSKFTDSLRLNLFNLYRFSSLVDPVRPGSEQDL

Nichols 421 VDIIIL  
SS14 421 VDIIIL  
Dal-1 421 VDIIIL  
Chicago 421 VDIIIL  
Mexico 421 VDIIIL

# Supplemental Figure 5B

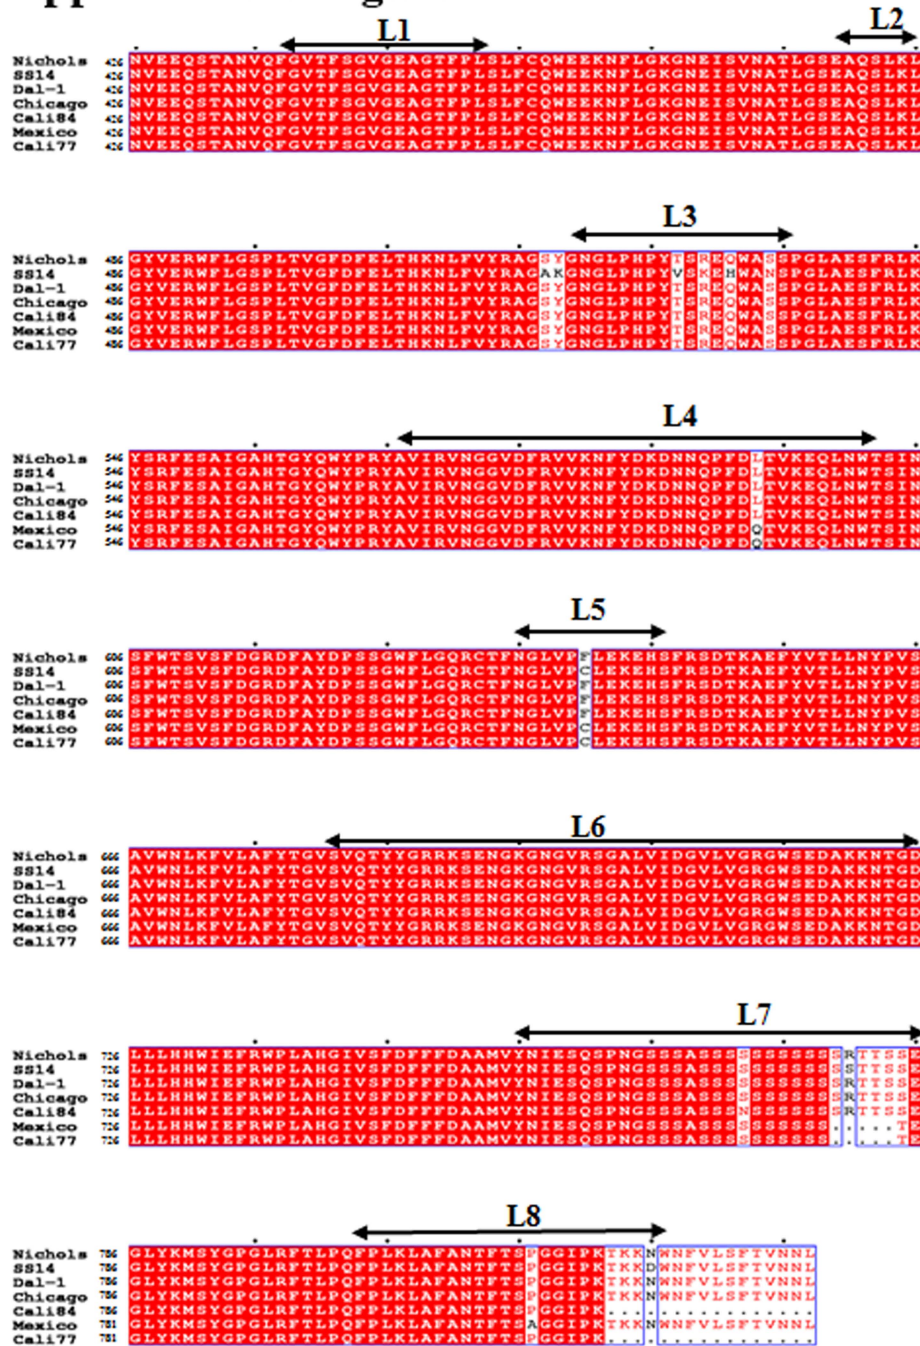

Supplemental Figure 5. Multiple sequence alignment of POTRA arm (A) and  $\beta$ -barrel (B) sequences from geographically diverse *T. pallidum* strains. Identical residues are highlighted in red. Accession numbers: Nichols (AAC65313); Chicago (ADD72452); SS14 (ACD70752); Dallas-1 (ABW94728); Mexico A (ABW94735), Cali84 (KP713716), Cali77 (KP713715).

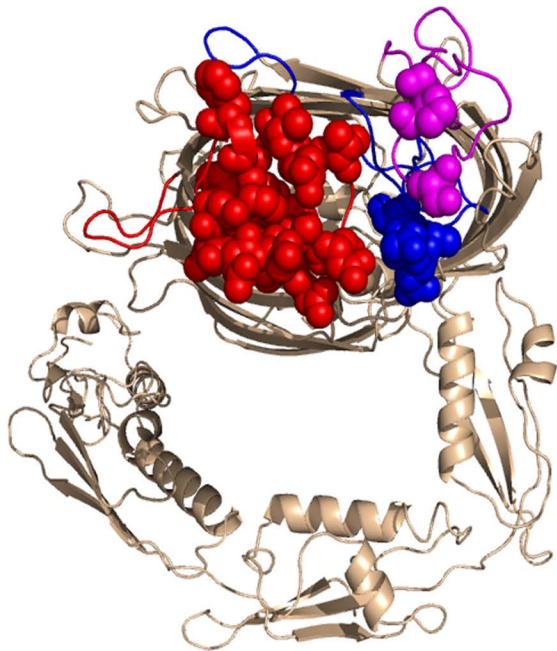

**Supplemental Figure 6.** Predicted conformational B cell epitopes in TP0326 are shown as spheres. The predicted three large extracellular loops L4, L6 and L7 are shown in red, blue and magenta, respectively.



**A**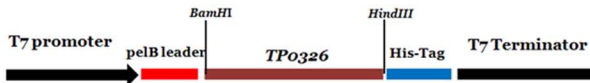**B**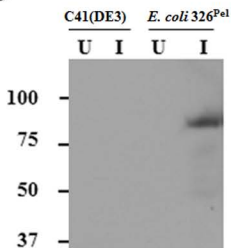**C**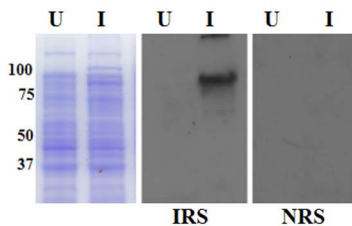

**Supplemental Figure 7. Construction and expression of  $326^{pel}$  in *E. coli*.** (A) Orientation of the  $326^{pel}$  construct in pET26b. Shown are the positions of PelB leader sequence, hexahistidine-tag and restriction sites used for cloning. (B) Immunoblot analysis of un-induced (U) and IPTG-induced (I) C41(DE3) or *E. coli*  $326^{pel}$  cells with rat anti-POTRA antiserum. (C) Immunoblot analysis of un-induced (U) and IPTG-induced (I) *E. coli*  $326^{pel}$  with C41(DE3)-adsorbed IRS and NRS. In panels B and C, molecular mass standards (kDa) are indicated on the right.
